# Supplementary material for: Tissue and plasma levels of galectins in patients with high grade serous ovarian carcinoma as new predictive biomarkers
Source: PubMed Central journal article supplement (PMC5643335; doi:10.1038/s41598-017-13802-5), 2017-10-16
Supplement: 41598_2017_13802_MOESM1_ESM.pdf [file 41598_2017_13802_MOESM1_ESM.pdf]

***Tissue and plasma levels of galectins in patients with high grade serous ovarian carcinoma as new predictive biomarkers***

Marilyne Labrie<sup>1</sup>, Lorena Oliveira Fernandes De Araujo<sup>1</sup>, Laudine Communal<sup>2,3</sup>, Anne-Marie Mes-Masson<sup>2,3,4</sup> and Yves St-Pierre<sup>1</sup>

**Supplementary File**

# Supplementary Table I

**Supplementary table I:** Patients characteristics (multi-subtype tissue microarray (n=63))

|                             | <b>Clear cell<br/>(n=12)</b> | <b>Endometrioid<br/>(n=21)</b> | <b>Mucinous<br/>(n=14)</b> | <b>Serous<br/>(n=16)</b> |
|-----------------------------|------------------------------|--------------------------------|----------------------------|--------------------------|
| <b>Age range<br/>(mean)</b> | 47-73 (57)                   | 43-80 (59)                     | 28-82 (54)                 | 33-79 (57)               |
| <b>Grade</b>                |                              |                                |                            |                          |
| <b>Borderline</b>           | 0                            | 0                              | 12                         | 3                        |
| <b>I (Low)</b>              | 0                            | 11                             | 1                          | 2                        |
| <b>II</b>                   | 4                            | 5                              | 1                          | 5                        |
| <b>III (High)</b>           | 8                            | 5                              | 0                          | 6                        |
| <b>Stage</b>                |                              |                                |                            |                          |
| <b>I</b>                    | 6                            | 13                             | 11                         | 2                        |
| <b>II</b>                   | 2                            | 1                              | 1                          | 3                        |
| <b>III</b>                  | 4                            | 6                              | 2                          | 10                       |
| <b>IV</b>                   | 0                            | 1                              | 0                          | 1                        |

## Supplementary Table II

**Supplementary table II:** Patients characteristics (HGSC tissue microarray (n=209))

---

|                              |               |
|------------------------------|---------------|
| <b>Age range (median)</b>    | 36-89 (64.5)  |
| <b>Figo Stage</b>            |               |
| I                            | 13            |
| II                           | 23            |
| III                          | 148           |
| IV                           | 25            |
| <b>CA-125 range (median)</b> | 5-13763 (667) |
| <b>Residual disease</b>      |               |
| No residual disease          | 40            |
| ≤ 1 cm                       | 51            |
| >1 cm ≤ 2 cm                 | 30            |
| > 2 cm                       | 50            |
| Unknown                      | 38            |
| <b>Chemotherapy</b>          |               |
| Paclitaxel/carboplatin       | 147           |
| Other                        | 60            |
| Unknown                      | 2             |
| <b>Reccurence</b>            |               |
| Yes                          | 172           |
| No                           | 37            |
| <b>Mortality</b>             |               |
| Yes                          | 140           |
| No                           | 69            |

---

## Supplementary Table III

**Supplementary Table III:** Correlation between the patients characteristics and galectins expression in cancer cells and stroma of HGSC.

|                            | Gal-1                   |                 | Gal-3   |         | Gal-7    |         | Gal-8                   |                | Gal-9                   |              |
|----------------------------|-------------------------|-----------------|---------|---------|----------|---------|-------------------------|----------------|-------------------------|--------------|
|                            | Low                     | High            | Low     | High    | Low      | High    | Low                     | High           | Low                     | High         |
| <b><u>Cancer cells</u></b> |                         |                 |         |         |          |         |                         |                |                         |              |
| <b>Age</b>                 |                         |                 |         |         |          |         |                         |                |                         |              |
| Mean                       | 61                      | 62              | 64      | 59      | 59       | 63      | 63                      | 61             | 62                      | 61           |
| <b>Figo Stage</b>          | <b><i>P</i> = 0.056</b> |                 |         |         |          |         |                         |                |                         |              |
| Low ( I-II)                | 29 (14)                 | 13 (6)          | 13 (7)  | 20 (11) | 13 (7)   | 20 (11) | 17 (9)                  | 17 (9)         | 16 (8)                  | 18 (9)       |
| High (III-IV)              | 84 (41)                 | <b>77 (38)</b>  | 58 (31) | 98 (52) | 71 (38)  | 85 (45) | 67 (34)                 | 98 (49)        | 82 (43)                 | 74 (39)      |
| <b>CA-125</b>              | <b><i>P</i> = 0.016</b> |                 |         |         |          |         |                         |                |                         |              |
| Median                     | 453.36                  | <b>809.5</b>    | 587.9   | 697.44  | 765.5    | 559.5   | 530.32                  | 618            | 553                     | 697.44       |
| <b>Residual disease</b>    |                         |                 |         |         |          |         |                         |                |                         |              |
| No                         | 21 (13)                 | 15 (9)          | 12 (8)  | 25 (16) | 17 (11)  | 20 (13) | 18 (11)                 | 20 (12)        | 21 (13)                 | 16 (10)      |
| Yes                        | 63 (40)                 | 59 (37)         | 50 (32) | 69 (44) | 51 (33)  | 68 (44) | 58 (35)                 | 70 (42)        | 60 (38)                 | 60 (38)      |
| <b>Recurrence</b>          | <b><i>P</i> = 0.092</b> |                 |         |         |          |         | <b><i>P</i> = 0.065</b> |                |                         |              |
| No                         | 23 (12)                 | 12 (6)          | 15 (8)  | 20 (11) | 18 (10)  | 17 (9)  | 21 (11)                 | 16 (8)         | 21 (11)                 | 14 (8)       |
| Yes                        | 75 (40)                 | <b>78 (41)</b>  | 56 (30) | 94 (51) | 63 (34)  | 87 (47) | 62 (32)                 | <b>96 (49)</b> | 76 (41)                 | 75 (40)      |
| <b>Death</b>               |                         |                 |         |         |          |         |                         |                |                         |              |
| No                         | 49 (28)                 | 36 (21)         | 30 (16) | 56 (30) | 41 (22)  | 45 (24) | 36 (18)                 | 53 (27)        | 47 (25)                 | 38 (20)      |
| Yes                        | 53 (31)                 | 34 (20)         | 41 (22) | 62 (33) | 43 (23)  | 60 (32) | 48 (24)                 | 62 (31)        | 51 (27)                 | 54 (28)      |
| <b><u>Stroma</u></b>       |                         |                 |         |         |          |         |                         |                |                         |              |
| <b>Age</b>                 |                         |                 |         |         |          |         |                         |                |                         |              |
| Mean                       | 61                      | 61              | 60      | 62      | 61       | 1       | 61                      | 61             | 61                      | 62           |
| <b>Figo Stage</b>          |                         |                 |         |         |          |         |                         |                |                         |              |
| Low (I-II)                 | 13 (7)                  | 19 (10)         | 16 (9)  | 16 (9)  | 31 (17)  | 1 (1)   | 22 (12)                 | 11 (6)         | 10 (5)                  | 23 (13)      |
| High (III-IV)              | 49 (26)                 | 111 (58)        | 92 (49) | 63 (34) | 141 (75) | 14 (7)  | 109 (58)                | 47 (25)        | 51 (28)                 | 100 (54)     |
| <b>CA-125</b>              | <b><i>P</i> = 0.125</b> |                 |         |         |          |         |                         |                | <b><i>P</i> = 0.074</b> |              |
| Median                     | 453.4                   | 793             | 548.5   | 828.5   | 589.5    | 769.5   | 618                     | 587.9          | 510                     | <b>767.5</b> |
| <b>Residual disease</b>    |                         |                 |         |         |          |         |                         |                |                         |              |
| No                         | 10 (6)                  | 26 (16)         | 20 (13) | 17 (11) | 35 (23)  | 2 (1)   | 23 (15)                 | 15 (9)         | 13 (9)                  | 23 (15)      |
| Yes                        | 42 (27)                 | 80 (51)         | 72 (47) | 45 (29) | 107 (69) | 10 (6)  | 85 (54)                 | 35 (22)        | 34 (23)                 | 81(54)       |
| <b>Recurrence</b>          | <b><i>P</i> = 0.008</b> |                 |         |         |          |         |                         |                |                         |              |
| No                         | 18 (10)                 | 17 (6)          | 19 (10) | 16 (9)  | 31 (17)  | 4 (2)   | 24 (13)                 | 11 (6)         | 11 (6)                  | 23 (13)      |
| Yes                        | 41 (22)                 | <b>112 (60)</b> | 86 (47) | 62 (34) | 137 (75) | 11 (6)  | 103 (56)                | 47 (25)        | 46 (26)                 | 100 (56)     |
| <b>Death</b>               | <b><i>P</i> = 0.027</b> |                 |         |         |          |         |                         |                |                         |              |
| No                         | 31 (16)                 | 54 (28)         | 46 (25) | 38 (20) | 77 (41)  | 7 (4)   | 53 (28)                 | <b>78 (41)</b> | 24 (13)                 | 58 (32)      |
| Yes                        | 31 (16)                 | 76 (40)         | 62 (33) | 41 (22) | 95 (51)  | 8 (4)   | 34 (18)                 | 24 (13)        | 37 (20)                 | 65 (35)      |



## Supplementary Table IV

**Supplementary table IV:** Correlation between the presence of galectins in the tumor and the plasma.

|            |          |   | Epithelium |          | Stroma    |          |
|------------|----------|---|------------|----------|-----------|----------|
|            |          |   | Negative   | Positive | Negative  | Positive |
| Galectin-8 |          |   | P = 0.280  |          | P = 0.007 |          |
| ELISA      | Negative | n | 28         | 54       | 46        | 33       |
|            |          | % | 34.1       | 65.9     | 58.2      | 41.8     |
|            | Positive | n | 24         | 30       | 41        | 9        |
|            |          | % | 44.4       | 55.6     | 82        | 18       |
| Galectin-9 |          |   | P = 0.152  |          | P = 0.689 |          |
| ELISA      | Negative | n | 34         | 21       | 17        | 36       |
|            |          | % | 61.8       | 38.2     | 32.1      | 67.9     |
|            | Positive | n | 35         | 38       | 19        | 50       |
|            |          | % | 47.9       | 52.1     | 27.5      | 72.5     |

## Supplementary figure 1

A

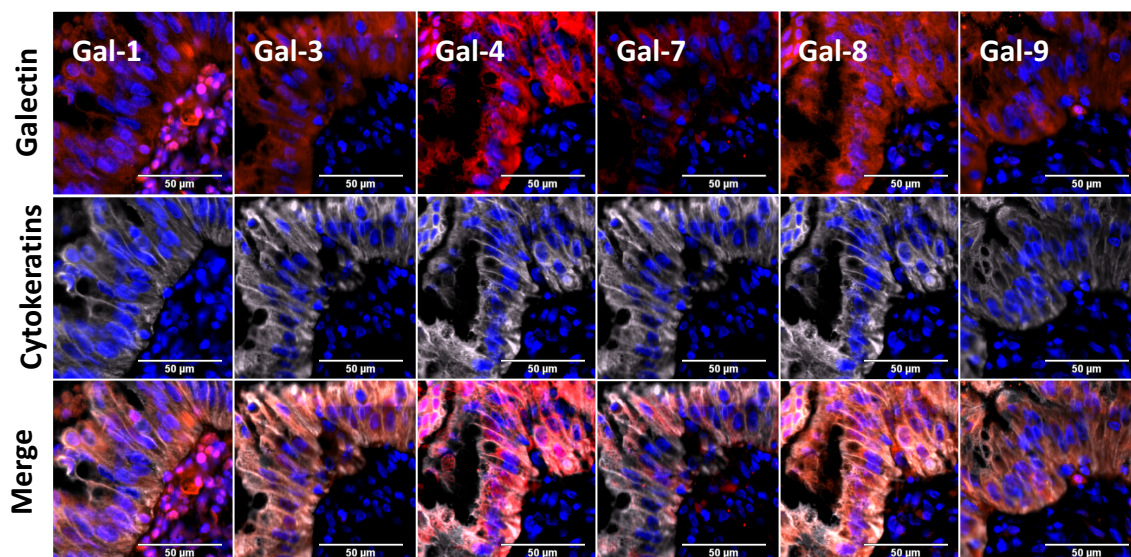

B

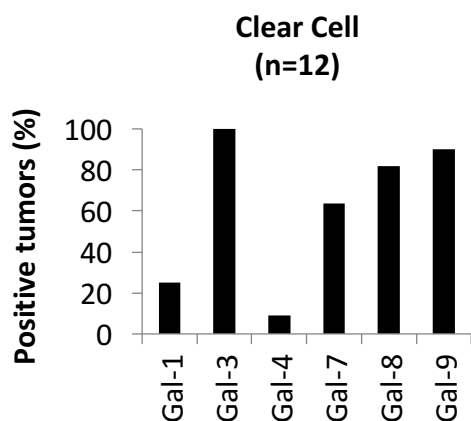

C

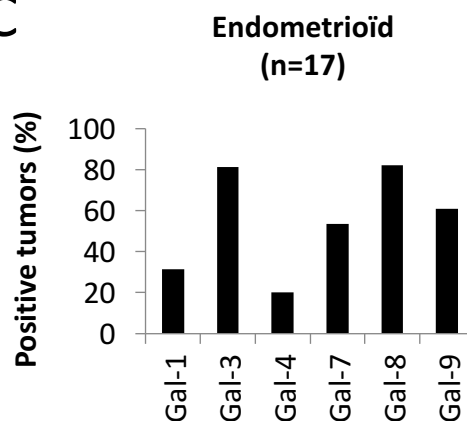

D

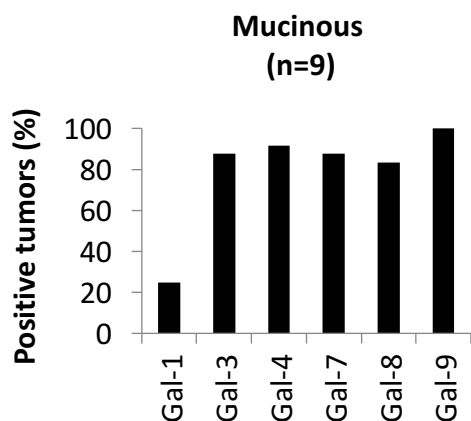

E

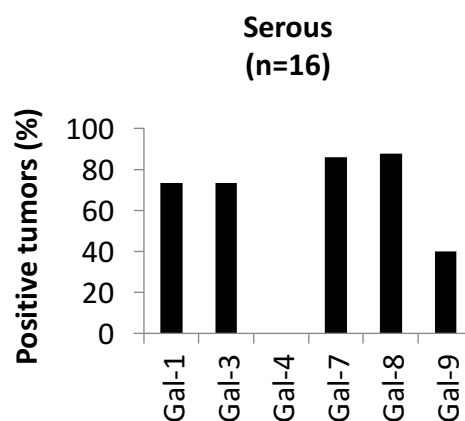

**Supplementary figure 1: Galectins expression in different histological subtypes of ovarian cancer.** (A) Positive IHF staining of gal-1, -3, -4, -7 -8 and -9 in a single mucinous tumor. Cytokeratin staining was used to identify epithelial cancer cells. Bar represent 50 µm. Percentage of positive tumors displaying expression of gal-1, -3, -4, -7, -8 and -9 in (B) clear cell, (C) endometrioid, (D) mucinous and (E) serous ovarian tumors.

## Supplementary figure 2

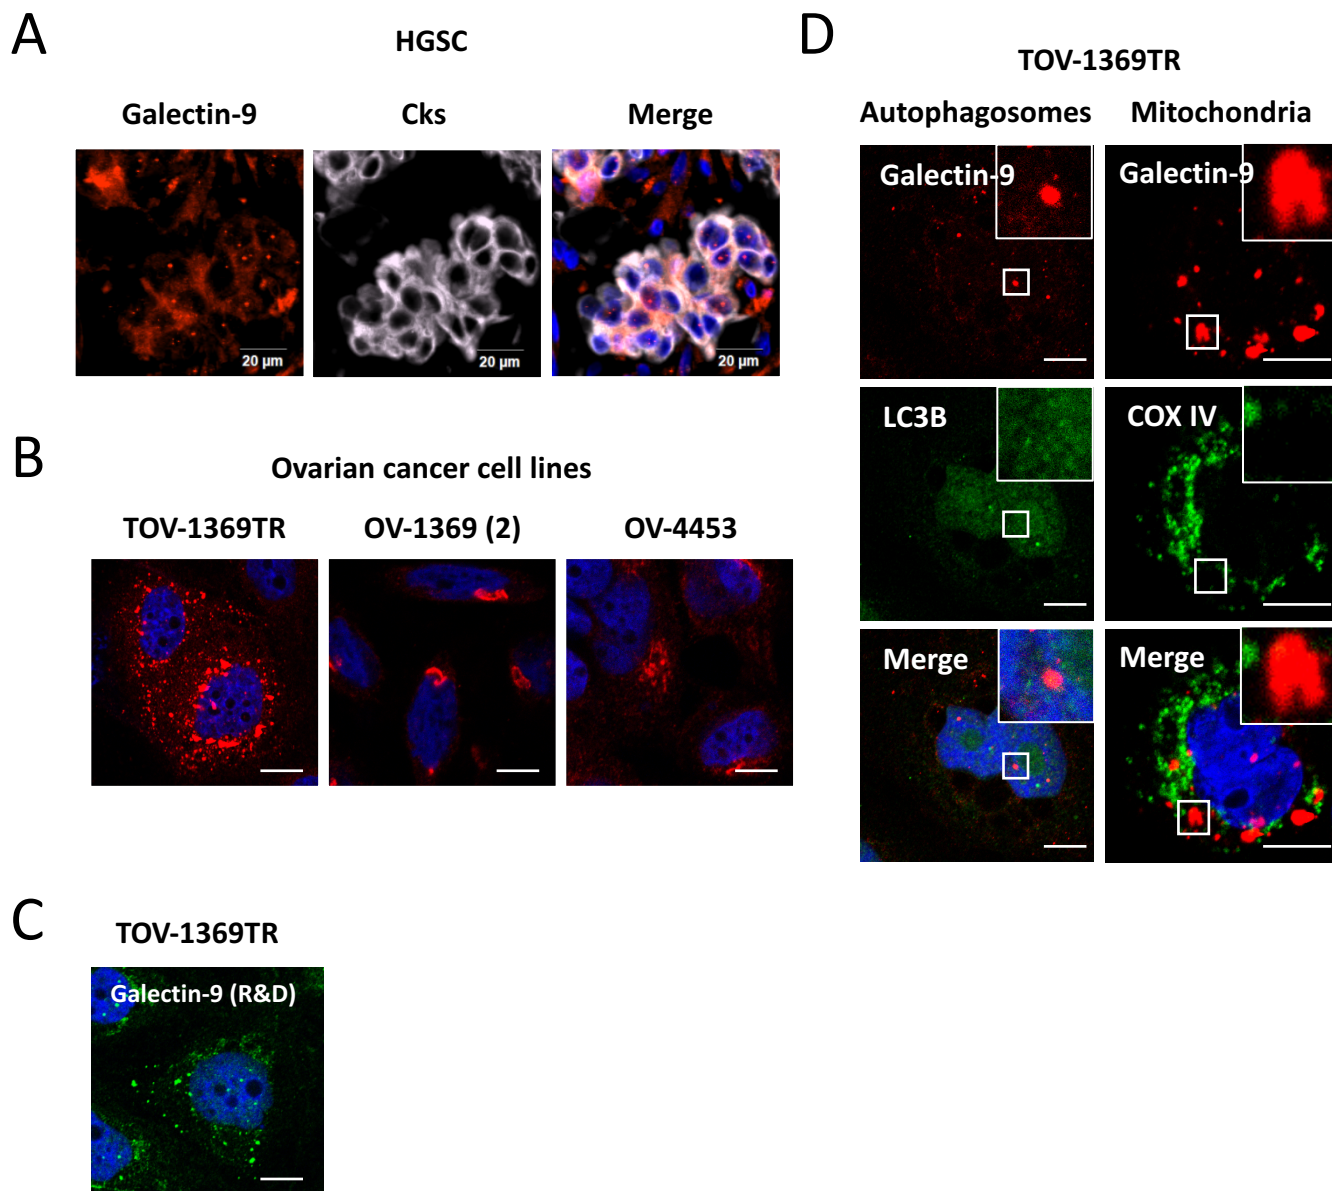

**Supplementary figure 2: Gal-9P in ovarian cancer cells.** (A) IHF staining of gal-9P in HGSC. Cytokeratin staining was used to identify epithelial cancer cells. Bar represent 20 µm. (B) IF staining of gal-9 (red) was detected by confocal imagery in Tov-1369TR, Tov-1369(2) and OV-4453 ovarian cancer cell lines. Nuclei were stained with DAPI (blue). (C) IF staining of gal-9 (red) was detected by confocal imagery in Tov-1369TR with a goat anti-gal-9 antibody (R&D). (D) IF staining of gal-9 (red), LC3B (green, left panel) and COX IV (green, right panel) in TOV-1369TR cells. LC3B and Cox IV antibodies were used to stain autophagosome and mitochondria, respectively. Nuclei were stained with DAPI (blue). Bars represent 10 µm.

## Supplementary figure 3

A

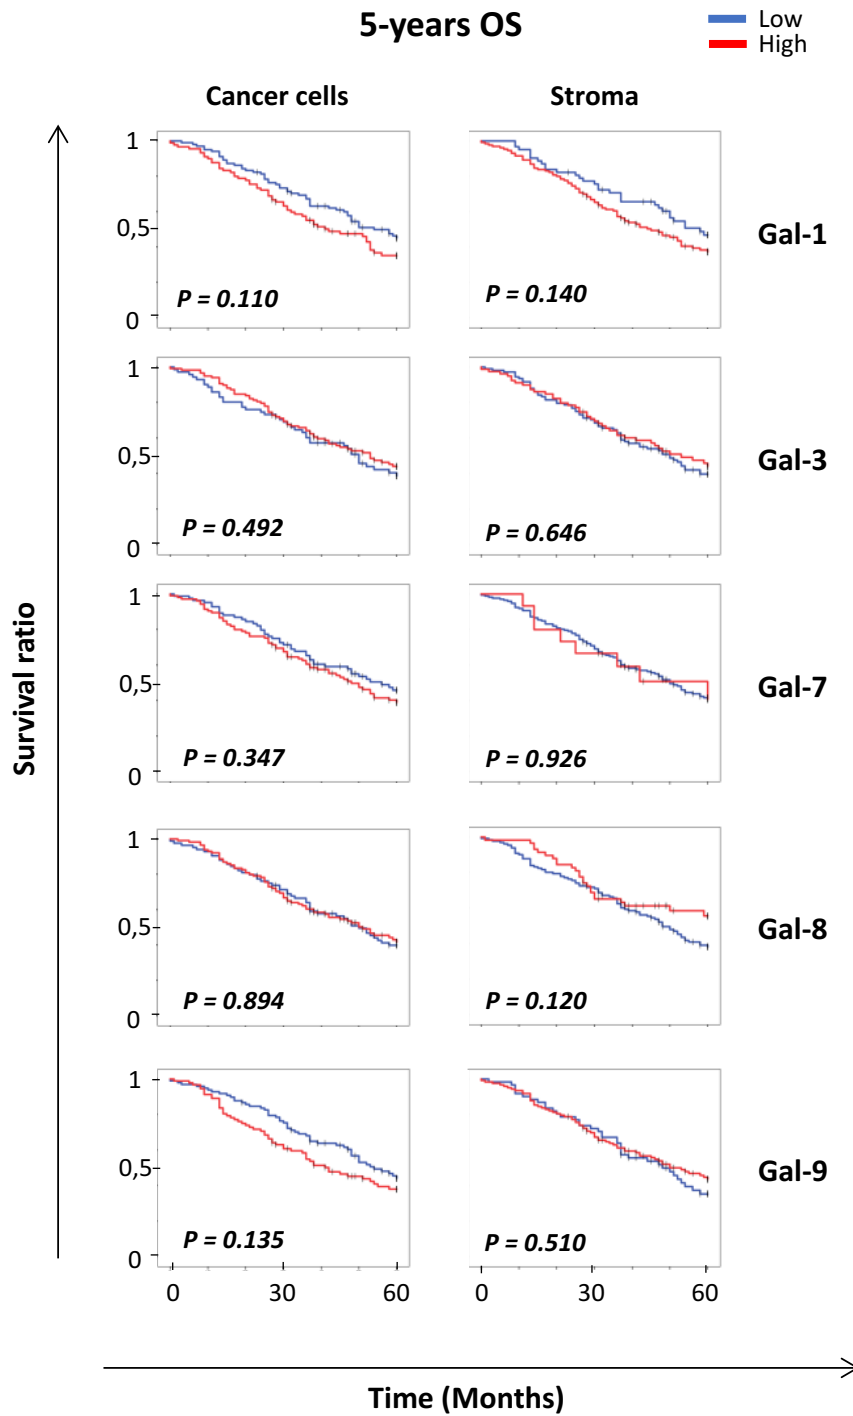

## Supplementary figure 3

B

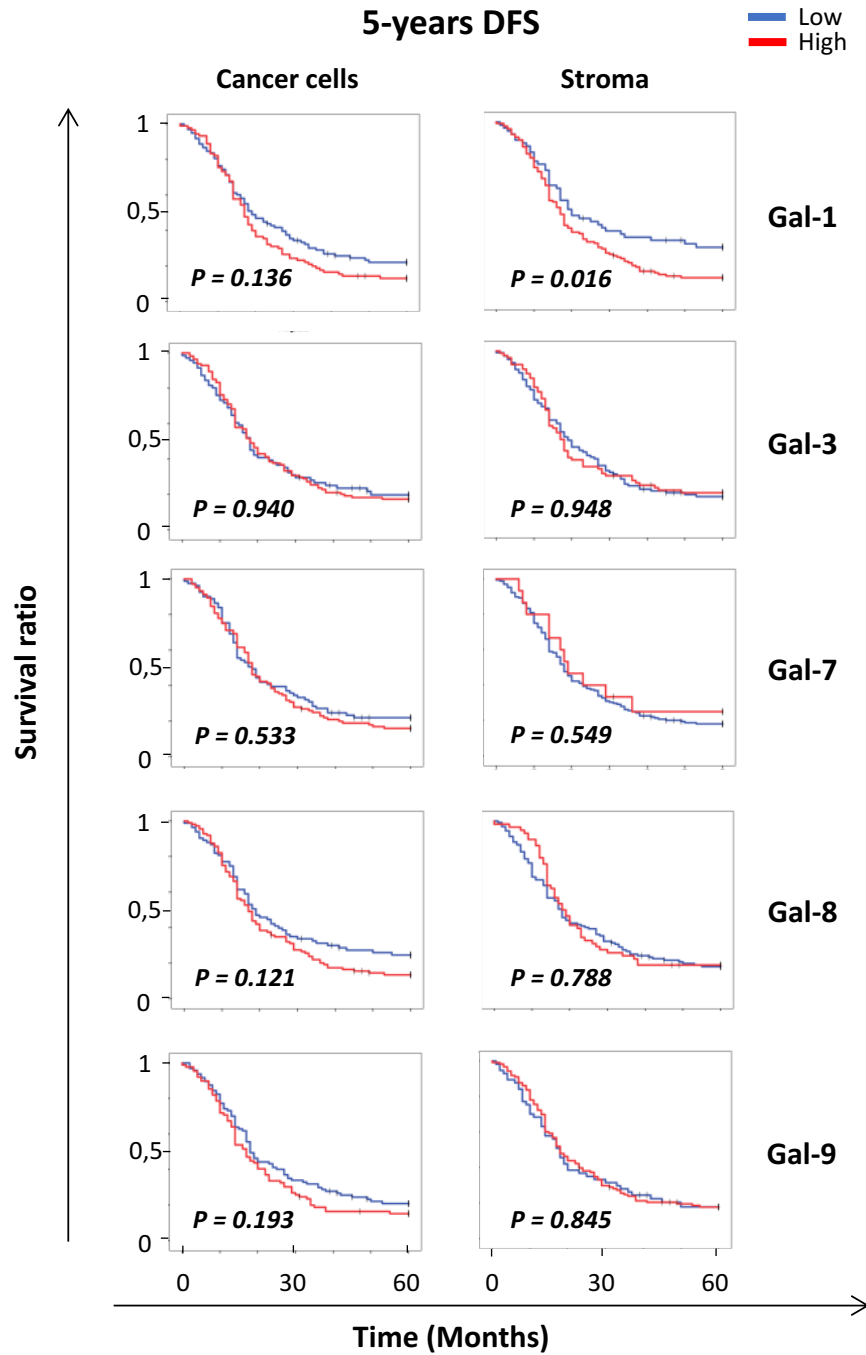

## Supplementary figure 3

C

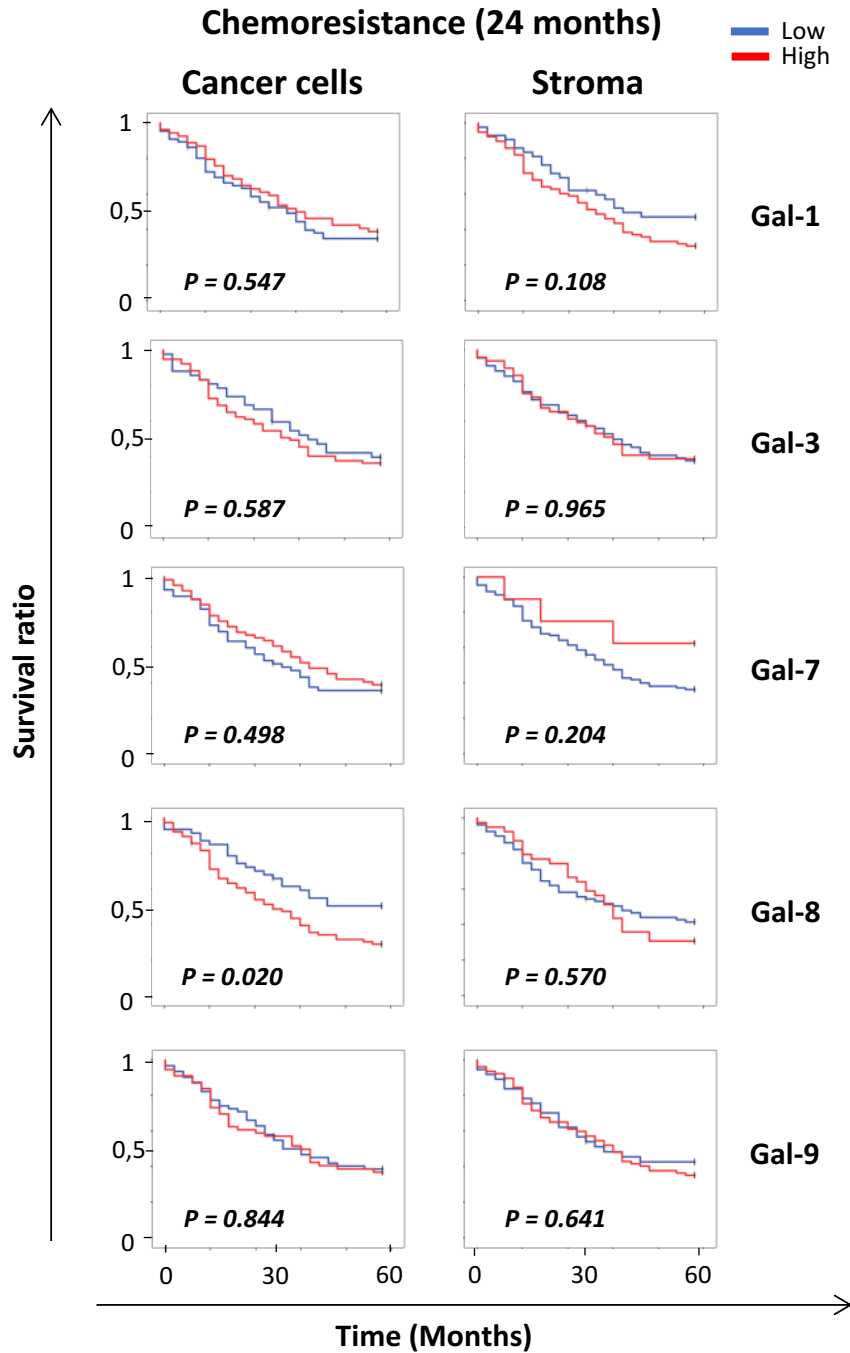

## Supplementary figure 3

D

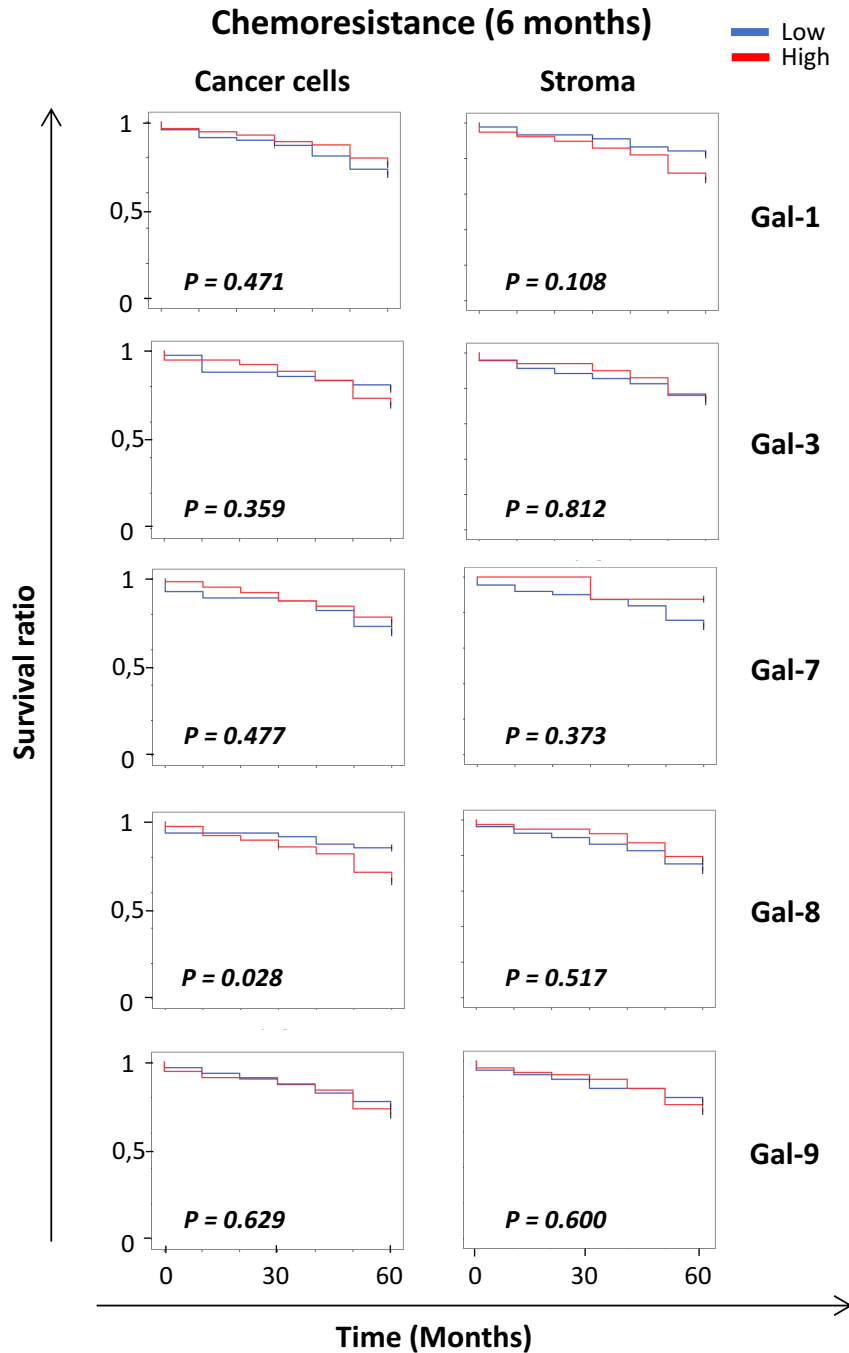

**Supplementary figure 3: Galectins predictive value of OS, DFS and chemoresistance.** Kaplan-Meier curves of (A) 5-years OS, (B) 5-years DFS and chemoresistance analyzed at (C) 24 months and (D) 6 months post-treatment according to epithelial or stromal presence of gal-1, -3, -7, -8 and -9. Blue bar: galectin negative tumors, red bar: galectin positive tumors.

## Supplementary figure 4

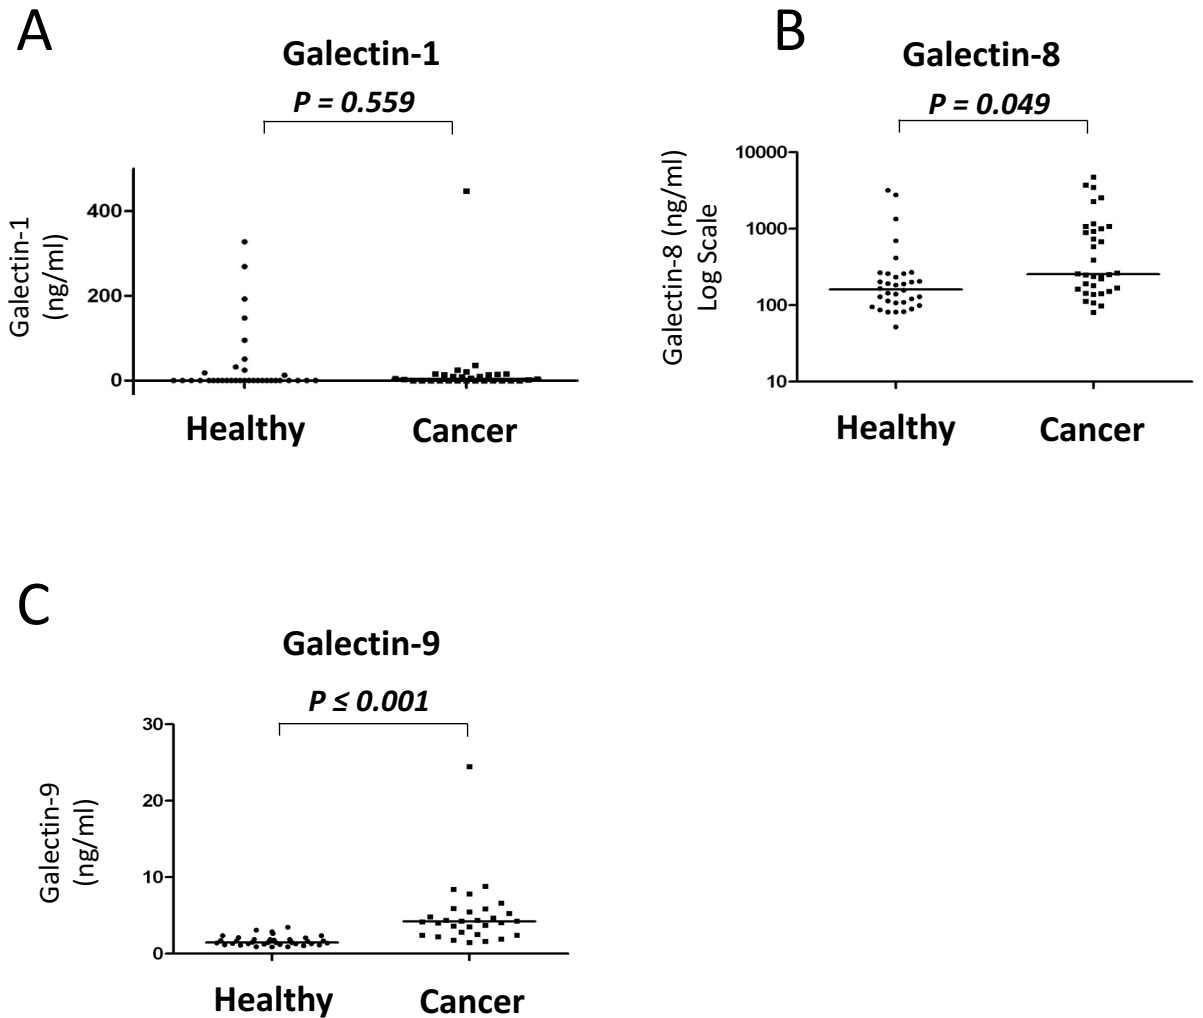

**Supplementary figure 4: Galectins concentration in the plasma of healthy donors and ovarian cancer patients.** Levels of circulating gal-1, gal-8 and gal-9 in 35 healthy donors and 35 cancer patients.
